# Supplementary material for: Boron doped fluorescent carbon nano dots for the reduction of ionic dyes and as encryption/decryption QR security code labels
Source: Royal Society of Chemistry journal article supplement (doi:10.1039/d2nj00786j), 2022-01-01
Supplement: d2nj00786j1.pdf [file d2nj00786j1.pdf]

## Electronic Supplementary Material (ESM)

### **Boron doped Fluorescent Carbon Nano Dots for reduction of ionic dyes and as Encryption and decryption QR code labels**

Jothi Vinoth Kumar <sup>1</sup>, Velusamy Arul <sup>2</sup>, Rajaram Arulmozhi <sup>1</sup> and Natarajan Abirami <sup>1\*</sup>

<sup>1</sup>Department of Chemistry, College of Engineering and Technology, SRM Institute of Science and Technology, Kattankulathur, Tamil Nadu-603 203, India.

<sup>2</sup>Department of Science and Humanities, Sri Venkateswara College of Technology, Vadkkal, Sriperumbudur, Chennai-602 105, Tamil Nadu, India.

\*Corresponding Author: E-mail: [abiramin@srmist.edu.in](mailto:abiramin@srmist.edu.in)

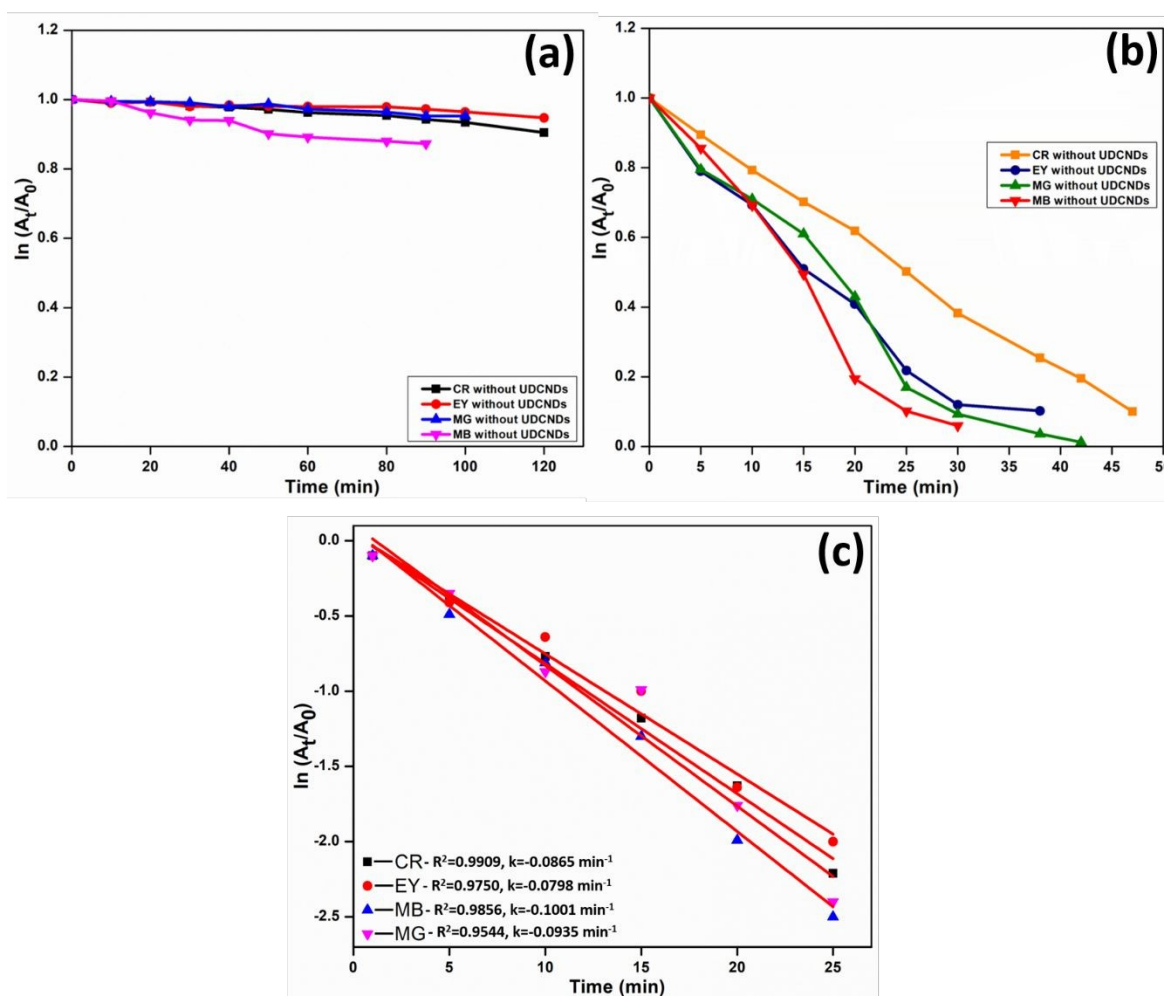

ESM 1. (a) Dyes with  $\text{NaBH}_4$  and without UDCNDs, (b) With catalyst UDCNDs, (c) Linear plots.

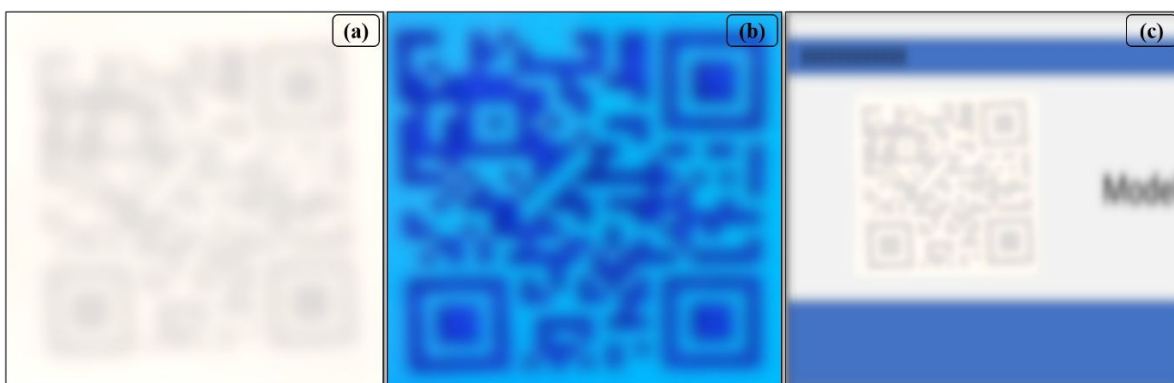

**ESM 2.** Pictures of the printed QR code on paper under (a) visible and (b) UV light. (C) Snapshot of the QR code-printed model currency (printed portion only has shown) under visible light. The photographs of the QR code and currency were blurred to avoid copyright issues.

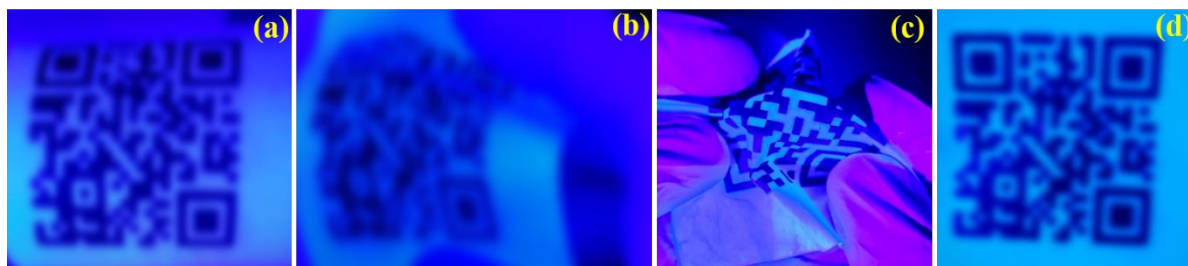

**ESM 3.** Photographs of the QR code security label (a, b) folding and (c) crushing (d) wetting assay under UV light. The photographs of the QR code and currency were blurred to avoid copyright issues.
